# Supplementary material for: A tetrapeptide from maize protects a transgenic Caenorhabditis elegans Aβ1-42model from Aβ-induced toxicity
Source: Royal Society of Chemistry journal article supplement (doi:10.1039/c6ra06130c), 2016-01-01
Supplement: c6ra06130c1.pdf [file c6ra06130c1.pdf]

## Supplementary material

### **A tetrapeptide from maize protects a transgenic *Caenorhabditis elegans* A $\beta$ 1-42 model from A $\beta$ -induced toxicity**

Zhixian Zhang<sup>a</sup>, Heran Ma<sup>a</sup>, Xiaoying Wang<sup>b</sup>, Ziyuan Zhao<sup>a</sup>, Yue Zhang<sup>a</sup>, Baolu

Zhao<sup>c</sup>, Yi Guo<sup>a,\*</sup>, Li Xu<sup>a,\*</sup>

<sup>a</sup> Key laboratory for Molecular Enzymology and Engineering, the Ministry of Education, National Engineering Laboratory for AIDS Vaccine, School of Life Sciences, Jilin University, Changchun 130012, China

<sup>b</sup> Jilin Province People's Hospital, Changchun 130021, China

<sup>c</sup> State Key Laboratory of Brain and Cognitive Science, Institute of Biophysics, Chinese Academy of Sciences, Beijing 100101, China

---

\* Corresponding authors.

Email addresses: [guoyi@jlu.edu.cn](mailto:guoyi@jlu.edu.cn) (Y. Guo), [xuli@jlu.edu.cn](mailto:xuli@jlu.edu.cn) (L. Xu).

## A $\beta$ 1-42 aggregation *in vitro*

Under the excitation of 450 nm, we can detect the intensity of fluorescence which can represent the quantity of A $\beta$  aggregation at 485 nm emission. A $\beta$ 1-42 monomer was prepared using hexafluoro-isopropanol (HFIP). Different concentrations of A $\beta$ 1-42 monomer were added into a 96-well plate with 50  $\mu$ M TPM and thioflavin T, the fluorescence intensity was measured using a microplate reader (infinite F200 Pro, TECAN) every 2 hours for 24 hours. For control group, we mixed PBS (pH 6.6) instead of TPM with A $\beta$ 1-42 monomer and Thioflavin T.

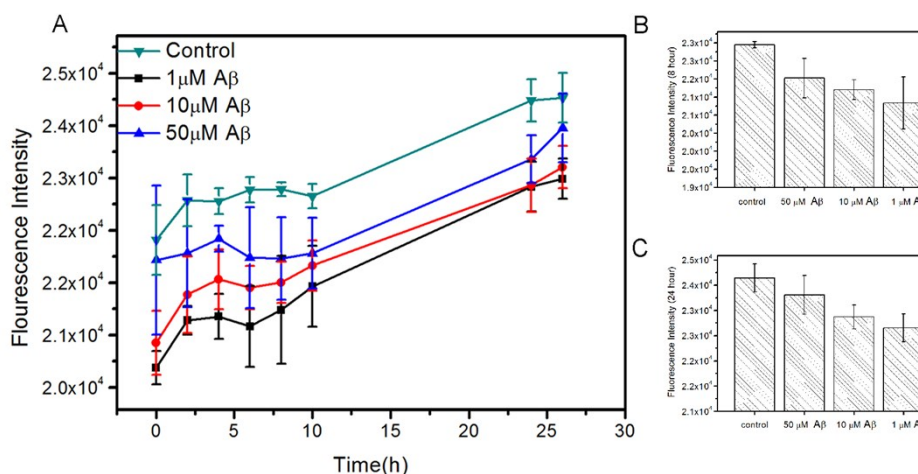

**Figure S1. TPM reduced the aggregation of different concentrations of A $\beta$ 1-42.**

A) 50  $\mu$ M TPM could inhibit the agglomeration of A $\beta$  aggregations, compared with control group in which there is 50  $\mu$ M A $\beta$  with no TPM. And the aggregation level is higher when the concentration increases. B) A $\beta$  aggregates in a dose-dependent way after shock incubating for 8 hours at 37  $^{\circ}$ C. C) A $\beta$  aggregates in a dose-dependent way after shock incubating for 24 hours at 37  $^{\circ}$ C.
